# Supplementary material
Source: PubMed Central journal article supplement (PMC5140087)
Supplement: NIHMS831681-supplement-Supp_File_2.pdf [file NIHMS831681-supplement-Supp_File_2.pdf]

## Supplementary Online Content

Fleshman J, Branda M, Sargent DJ, et al. Effect of laparoscopic-assisted resection vs open resection of stage II or III rectal cancer on pathologic outcomes: the ACOSOG Z6051 randomized clinical trial. *JAMA*. doi:10.1001/jama.2015.10529.

**eAppendix A.** Funding

**eAppendix B.** Credentialing

**eAppendix C.** Trial modification

**eAppendix D.** Operative and pathology review

**eReferences**

This supplementary material has been provided by the authors to give readers additional information about their work.

## **Supplementary Appendix**

This appendix has been provided by the authors to give readers additional information about their work.

### **A Phase III Prospective Randomized Trial Comparing Laparoscopic–assisted Resection versus Open Resection of Rectal Cancer: ACOSOG Z6051 (Alliance)**

Funding: Research reported in this publication was supported by the National Cancer Institute of the National Institutes of Health under Award Numbers U10CA180821 and U10CA180882 to the Alliance for Clinical Trials in Oncology and CA076001 to the legacy American College of Surgeons Oncology Group (ACOSOG). The content is solely the responsibility of the authors and does not necessarily represent the official views of the National Institutes of Health. (ClinicalTrials.gov number, NCT00726622.)

### Supplemental B: Credentialing

Surgeons (46 surgeons from 35 institutions) were credentialed in both laparoscopic colectomy and proctectomy. Surgeons submitted an unedited LapR video for review as part of the requirement for participation. Submission of 20 operative reports for both OpR of RC and LapR of RC or other deep pelvic dissection was used by the credentialing committee to qualify participants. Surgeons who did not take part in the Clinical Outcomes of Surgical Therapy (COST) Trial for laparoscopic colectomy for cancer had to submit 20 operative reports of laparoscopic colectomy for colon cancer with pathology reports to document basic laparoscopic skills.<sup>18,20</sup> Surgeons who participated in the COST trial did not take part in the colon part of the credentialing. Relevant features of the operation demonstrated for credentialing are in the Interventions section.

Surgeons choosing to utilize robotic techniques for the LapR were required to be credentialed in the use of robotic technique for the pelvic TME. Surgeons submitted operative and pathology reports (which included a photo of the TME specimen) from ten cases of robotic rectal dissection and an unedited video of the technique. No surgeon was credentialed only for robotics.

### Supplemental C: Trial Modification

The primary outcome for the trial was the adequacy of the surgical approach determined by three oncological parameters: negative distal margins (DM, >1 mm between the closest tumor to the cut edge of the tissue), negative circumferential radial margins (CRM, >1 mm between the deepest extent of tumor invasion into the mesorectal fat and the inked surface of the specimen), and “complete” TME specimen (smooth surface of mesorectal fascia with all fat contained in the enveloping fascia, to a level 5 cm below the tumor for tumor specific TME for upper RC, or the entire mesorectal envelope present for low RC) or “nearly complete” (the mesorectal envelope is intact except for defects no more than 5 mm deep with no loss of mesorectal fat). For primary analysis “complete” and “nearly complete” grades were considered together. All three of the parameters (DM, CRM, and TME quality) had to be achieved for the surgery to be considered a “success”.

The protocol-specified DM was modified from >2 cm on permanent section (or >1 cm on frozen section) to >1 mm midway through the study by consensus of the steering committee and DSMB because new findings demonstrated the DM in patients receiving neoadjuvant chemoradiation therapy could be less.<sup>22-35</sup> A potential unintended consequence of the original DM requirements was an increase in the number of patients who underwent APR and colostomy when a low rectal anastomosis would have been sufficient.

Classification of the TME specimen as “nearly complete” differs from the description of the intermediate “intra-mesorectal” level of the dissection plane as originally described by Quirke and colleagues.<sup>4</sup> The “intra-mesorectal” classification refers to a dissection within the fatty mesentery and failure to remove all of the fat of the mesentery in total. The “intra-mesorectal” classification would be considered “incomplete” in the current study. The “nearly complete” designation reflects small superficial tears or defects in the fascia of the rectum less than 5 mm deep without loss of fat content of the mesorectum. This designation reflects some extraction trauma or incision into, but no removal of,

the fascia or fat. Based on current evidence, the Steering and DSMB committees adopted “Complete” and “nearly complete” TME as adequate specimens.<sup>36</sup>

#### Supplemental D: Operative and Pathology Review

A 20% sample of intraoperative videos of the laparoscopic technique from the first 100 cases of LapR was randomly selected for review by steering committee members of technique as quality control and random audit. This review was reported to the ACOSOG Data and Safety Monitoring Board (DSMB) before continuing the study, without the need for further audit of technique.

Photos of every TME specimen were requested and reviewed for quality by a third party observer blinded to technique used. The photograph of the TME specimen was taken either in the pathology laboratory or the operating room, and grading of TME quality occurred. The inclusion of TME grading in the synoptic pathology report was mandated by the American College of Pathology during the study period.

Of the completed surgeries, 352 (76.4%) of the photos were received. Reasons for missing photos was either the photo was not taken or there were technical issues in which the photo was lost. 330 (93.8%) of the 352 photos were interpretable and were assessed for TME quality. TME findings were compared between site reported and the photo review. Agreement was found in 226 (80.6%) cases.

## eReferences

1. Leo E, Belli F, Miceli R, et al. Distal clearance margin of 1 cm or less: a safe distance in lower rectum cancer surgery. *Int J Colorectal Dis* 2009;24:317-22.
2. Rutkowski A, Nowacki MP, Chwalinski M, et al. Acceptance of a 5-mm distal bowel resection margin for rectal cancer: is it safe? *Colorectal Dis* 2012;14:71-8.
3. Kiran RP, Lian L, Lavery IC. Does a subcentimeter distal resection margin adversely influence oncologic outcomes in patients with rectal cancer undergoing restorative proctectomy? *Dis Colon Rectum* 2011;54:157-63.
4. Park JH, Kim HC, Cho YK, et al. Narrow distal resection margin may be sufficient for rectal cancer after chemoradiation. *Hepatogastroenterology* 2011;58:769-74.
5. Fitzgerald TL, Brinkley J, Zervos EE. Pushing the envelope beyond a centimeter in rectal cancer: oncologic implications of close, but negative margins. *J Am Coll Surg* 2011;213:589-95.
6. Bujko K, Rutkowski A, Chang GJ, Michalski W, Chmielik E, Kusnierz J. Is the 1-cm rule of distal bowel resection margin in rectal cancer based on clinical evidence? A systematic review. *Ann Surg Oncol* 2012;19:801-8.
7. Komori K, Kanemitsu Y, Ishiguro S, et al. Adequate length of the surgical distal resection margin in rectal cancer: from the viewpoint of pathological findings. *Am J Surg* 2012;204:474-80.
8. Kwak JY, Kim CW, Lim SB, et al. Oncologically safe distal resection margins in rectal cancer patients treated with chemoradiotherapy. *J Gastrointest Surg* 2012;16:1947-54.
9. Pahlman L, Bujko K, Rutkowski A, Michalski W. Altering the therapeutic paradigm towards a distal bowel margin of < 1 cm in patients with low-lying rectal cancer: a systematic review and commentary. *Colorectal Dis* 2013;15:e166-74.
10. Calvo FA, Rivas F, Sole CV, et al. Post-chemoradiation anastomotic recurrence in locally advanced rectal cancer: no increased risk associated with distal margin. *Clin Transl Oncol* 2014;16:573-80.
11. Kuvshinoff B, Maghfoor I, Miedema B, et al. Distal margin requirements after preoperative chemoradiotherapy for distal rectal carcinomas: are < or = 1 cm distal margins sufficient? *Ann Surg Oncol* 2001;8:163-9.
12. Park IJ, Kim JC. Adequate length of the distal resection margin in rectal cancer: from the oncological point of view. *J Gastrointest Surg* 2010;14:1331-7.
13. Kim TG, Park W, Choi DH, et al. The adequacy of the distal resection margin after preoperative chemoradiotherapy for rectal cancer. *Colorectal Dis* 2014;16:O257-63.
14. Nash GM, Weiss A, Dasgupta R, Gonen M, Guillem JG, Wong WD. Close distal margin and rectal cancer recurrence after sphincter-preserving rectal resection. *Dis Colon Rectum* 2010;53:1365-73.
15. Hoffmann CE, McDonald PJ, Watts JM. Use of preoperative cefoxitin to prevent infection after colonic and rectal surgery. *Ann Surg* 1981;193:353-6.
16. Hu JK, Zhou ZG, Chen ZX, et al. Comparative evaluation of immune response after laparoscopic and open total mesorectal excisions with anal sphincter preservation in patients with rectal cancer. *World journal of gastroenterology : WJG* 2003;9:2690-4.
17. Leroy J, Jamali F, Forbes L, et al. Laparoscopic total mesorectal excision (TME) for rectal cancer surgery: long-term outcomes. *Surg Endosc* 2004;18:281-9.
18. Leung KL, Kwok SP, Lau WY, et al. Laparoscopic-assisted abdominoperineal resection for low rectal adenocarcinoma. *Surg Endosc* 2000;14:67-70.
19. Lord SA, Larach SW, Ferrara A, Williamson PR, Lago CP, Lube MW. Laparoscopic resections for colorectal carcinoma. A three-year experience. *Dis Colon Rectum* 1996;39:148-54.
20. Lumley JW, Fielding GA, Rhodes M, Nathanson LK, Siu S, Stitz RW. Laparoscopic-assisted colorectal surgery. Lessons learned from 240 consecutive patients. *Dis Colon Rectum* 1996;39:155-9.

21. Marti MC, Auckenthaler R. Antibiotic prophylaxis in large bowel surgery: results of a controlled clinical trial. *Surgery* 1983;93:190-6.
22. Milsom JW, Bohm B, Decanini C, Fazio VW. Laparoscopic oncologic proctosigmoidectomy with low colorectal anastomosis in a cadaver model. *Surg Endosc* 1994;8:1117-23.
23. Nelson H, Weeks JC, Wieand HS. Proposed phase III trial comparing laparoscopic-assisted colectomy versus open colectomy for colon cancer. *J Natl Cancer Inst Monogr* 1995:51-6.
24. Peters WR, Fleshman JW. Minimally invasive colectomy in elderly patients. *Surg Laparosc Endosc* 1995;5:477-9.
25. Petrelli N, Rosenfield L, Herrera L, Mittelman A. The morbidity of perineal wounds following abdominoperineal resection for rectal carcinoma. *J Surg Oncol* 1986;32:138-40.
26. Pietrabissa A, Moretto C, Carobbi A, Boggi U, Ghilli M, Mosca F. Hand-assisted laparoscopic low anterior resection: initial experience with a new procedure. *Surg Endosc* 2002;16:431-5.
27. Poulin EC, Schlachta CM, Gregoire R, Seshadri P, Cadeddu MO, Mamazza J. Local recurrence and survival after laparoscopic mesorectal resection for rectal adenocarcinoma. *Surg Endosc* 2002;16:989-95.
28. Reilly WT, Nelson H, Schroeder G, Wieand HS, Bolton J, O'Connell MJ. Wound recurrence following conventional treatment of colorectal cancer. A rare but perhaps underestimated problem. *Dis Colon Rectum* 1996;39:200-7.
29. Rullier E, Sa Cunha A, Couderc P, Rullier A, Gontier R, Saric J. Laparoscopic intersphincteric resection with coloplasty and coloanal anastomosis for mid and low rectal cancer. *Br J Surg* 2003;90:445-51.
30. Scheidbach H, Schneider C, Konradt J, et al. Laparoscopic abdominoperineal resection and anterior resection with curative intent for carcinoma of the rectum. *Surg Endosc* 2002;16:7-13.
31. Stocchi L, Wolff BG. Operative techniques for radical surgery for rectal carcinoma: can surgeons improve outcomes? *Surg Oncol Clin N Am* 2000;9:785-98; discussion 99-800.
32. Vignali A, Fazio VW, Lavery IC, et al. Factors associated with the occurrence of leaks in stapled rectal anastomoses: a review of 1,014 patients. *J Am Coll Surg* 1997;185:105-13.
33. Vithiananthan S, Cooper Z, Betten K, et al. Hybrid laparoscopic flexure takedown and open procedure for rectal resection is associated with significantly shorter length of stay than equivalent open resection. *Dis Colon Rectum* 2001;44:927-35.
34. Weaver DW, Eachempati SR. Laparoscopically assisted transsacral resection of rectal cancer with primary anastomosis. A preliminary review. *Surg Endosc* 2000;14:703-7.
35. Wexner SD, Cohen SM. Port site metastases after laparoscopic colorectal surgery for cure of malignancy. *Br J Surg* 1995;82:295-8.
36. Wishner JD, Baker JW, Jr., Hoffman GC, et al. Laparoscopic-assisted colectomy. The learning curve. *Surg Endosc* 1995;9:1179-83.
37. Wu JS, Birnbaum EH, Fleshman JW. Early experience with laparoscopic abdominoperineal resection. *Surg Endosc* 1997;11:449-55.
38. Wu JS, Jones DB, Guo LW, et al. Effects of pneumoperitoneum on tumor implantation with decreasing tumor inoculum. *Dis Colon Rectum* 1998;41:141-6.
39. Wu WX, Sun YM, Hua YB, Shen LZ. Laparoscopic versus conventional open resection of rectal carcinoma: A clinical comparative study. *World journal of gastroenterology : WJG* 2004;10:1167-70.
40. Yamamoto S, Watanabe M, Hasegawa H, Kitajima M. Prospective evaluation of laparoscopic surgery for rectosigmoidal and rectal carcinoma. *Dis Colon Rectum* 2002;45:1648-54.
